# Supplementary material for: Effects of Nutrient Limitation on the Synthesis of N-Rich Phytoplankton Toxins: A Meta-Analysis
Source: PubMed Central journal article supplement (PMC7232484; doi:10.3390/toxins12040221), 2020-04-01
Supplement: toxins-12-00221-s001.pdf [file toxins-12-00221-s001.pdf]

## Supplementary Materials: Effects of Nutrient Limitation on the Synthesis of N-Rich Phytoplankton Toxins – a Meta-analysis

Karen Brandenburg, Laura Siebers, Joost Keuskamp, Thomas Jephcott and Dedmer Van de Wall

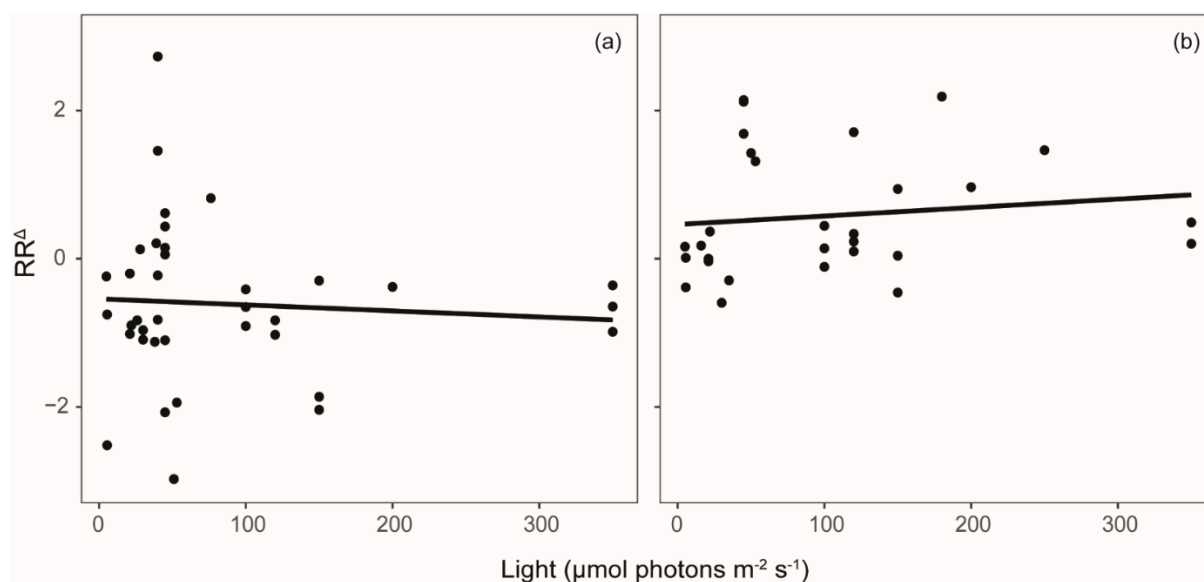

**Figure S1.** The natural log response ratios ( $RR^A$ ) for toxin content plotted against irradiance for (a) N and (b) P limitation. (a)  $R^2=-0.02$ ,  $P=0.68$ , (b)  $R^2=-0.03$ ,  $P=0.71$ .
